# Supplementary material
Source: PubMed Central journal article supplement (PMC3251330)
Supplement: NIHMS341682-supplement-sf1.pdf [file NIHMS341682-supplement-sf1.pdf]

Figure 1s: Iloprost Trial Endobronchial Histology

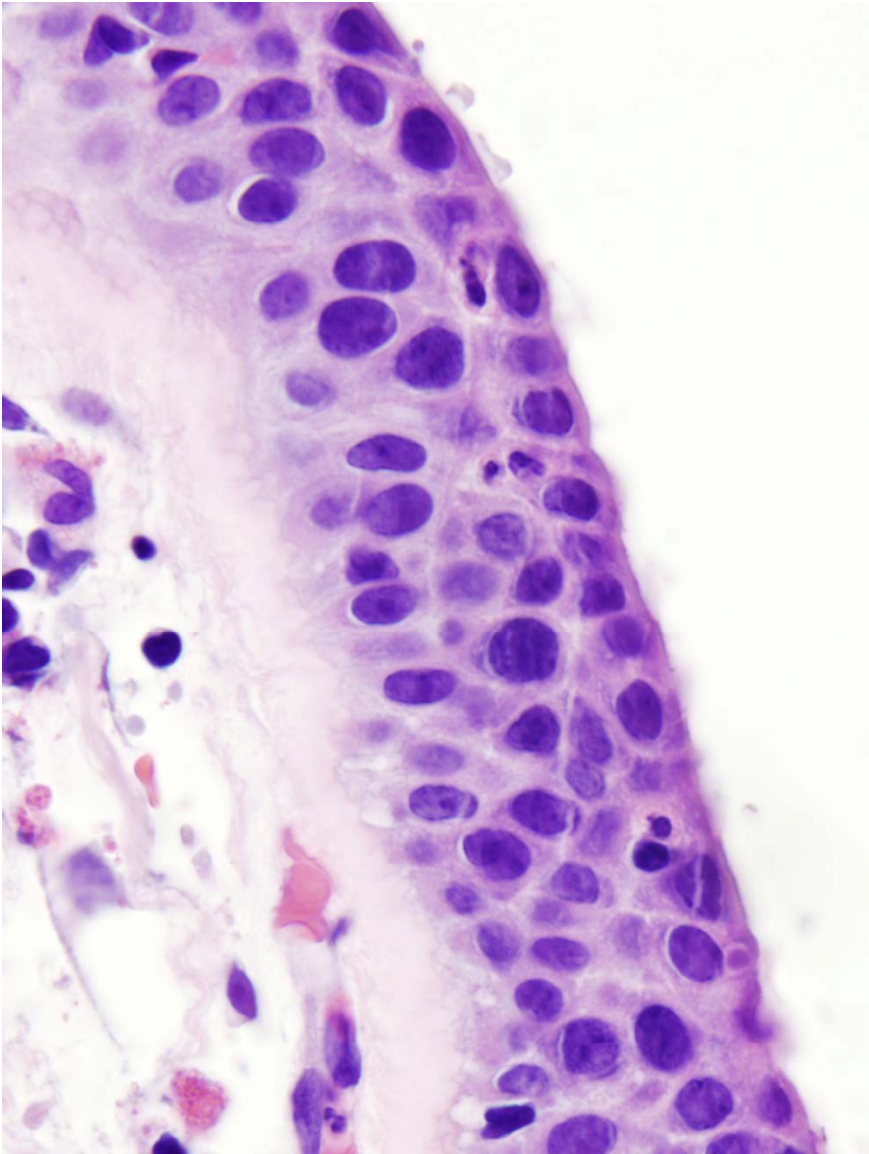

RB1/2 baseline (severe dysplasia)

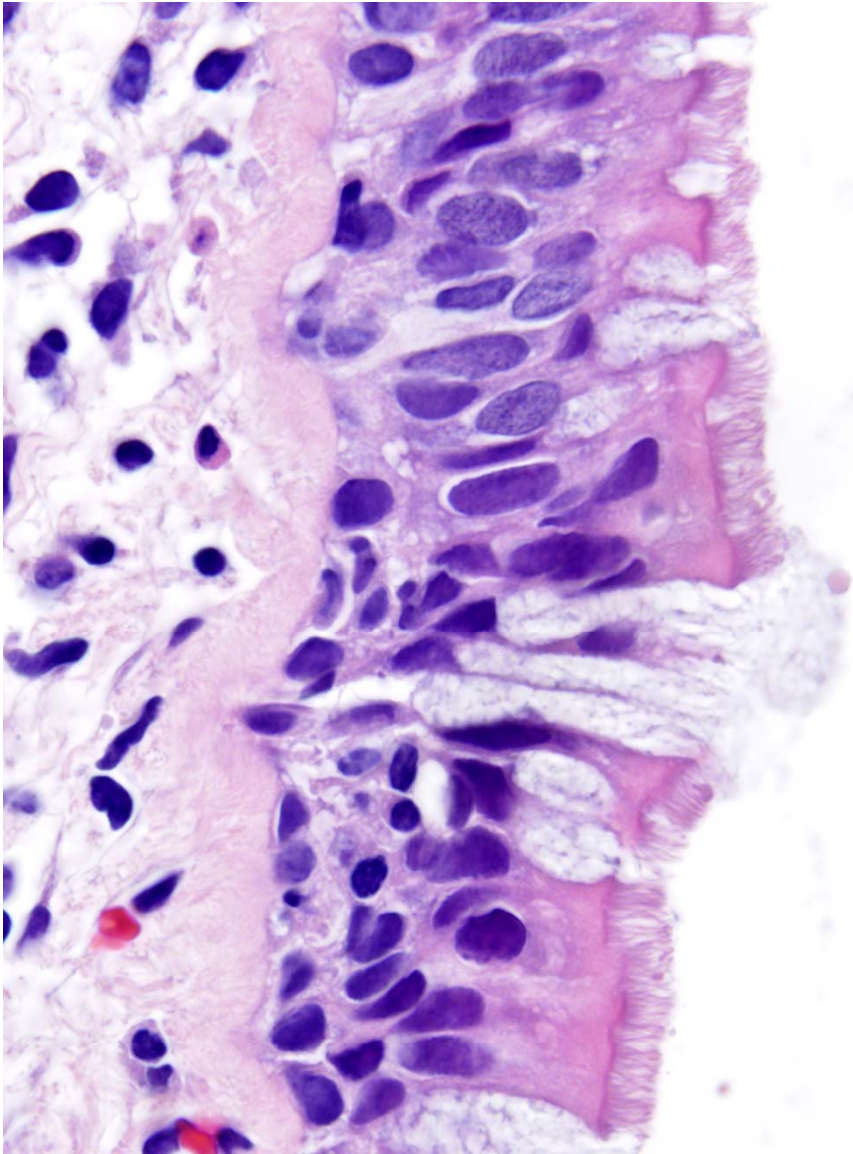

RB1/2 after iloprost (normal mucosa)
