# Supplementary material
Source: PubMed Central journal article supplement (PMC3251330)
Supplement: NIHMS341682-supplement-st1.pdf [file NIHMS341682-supplement-st1.pdf]

Table 1S: Iloprost Treatment Effects on Bronchial Histology

|                     |             | Iloprost |         |        | Placebo  |         |        | Treatment Effect |                 |         |
|---------------------|-------------|----------|---------|--------|----------|---------|--------|------------------|-----------------|---------|
|                     |             | Baseline | 6-Month | Change | Baseline | 6-Month | Change | Difference       | 95% CI          | P-Value |
| All Completers      |             |          |         |        |          |         |        |                  |                 |         |
| All Biopsies        | Average     | 2.64     | 2.41    | -0.23  | 2.56     | 2.54    | -0.02  | -0.15            | (-0.39, 0.09)   | 0.210   |
|                     | Worst       | 4.25     | 3.85    | -0.40  | 3.91     | 4.14    | 0.23   | -0.43            | (-0.84, -0.03)  | 0.038   |
|                     | Dysp. Index | 34.97    | 27.27   | -7.70  | 34.23    | 33.32   | -0.92  | -5.97            | (-13.28, 1.33)  | 0.112   |
| Reference Sites     | Average     | 2.61     | 2.38    | -0.23  | 2.51     | 2.49    | -0.01  | -0.16            | (-0.42, 0.10)   | 0.232   |
|                     | Worst       | 3.92     | 3.57    | -0.35  | 3.71     | 3.82    | 0.11   | -0.30            | (-0.73, 0.12)   | 0.165   |
|                     | Dysp. Index | 34.08    | 26.47   | -7.61  | 32.21    | 32.36   | 0.15   | -6.49            | (-14.45, 1.46)  | 0.112   |
| Matched Sites       | Average     | 2.67     | 2.43    | -0.24  | 2.56     | 2.50    | -0.06  | -0.12            | (-0.37, 0.13)   | 0.355   |
|                     | Worst       | 4.23     | 3.70    | -0.53  | 3.91     | 4.02    | 0.11   | -0.45            | (-0.88, -0.03)  | 0.037   |
|                     | Dysp. Index | 35.80    | 27.83   | -7.97  | 34.51    | 32.18   | -2.34  | -4.66            | (-12.17, 2.85)  | 0.227   |
| BL Non-Normal Pairs | Average     | 3.55     | 2.84    | -0.71  | 3.31     | 2.92    | -0.38  | -0.22            | (-0.56, 0.12)   | 0.210   |
|                     | Worst       | 4.73     | 3.92    | -0.81  | 4.44     | 4.31    | -0.13  | -0.51            | (-0.99, -0.02)  | 0.043   |
|                     | Dysp. Index | 54.33    | 40.00   | -14.32 | 49.16    | 42.69   | -6.48  | -4.51            | (-15.58, 6.55)  | 0.426   |
| Former Smokers      |             |          |         |        |          |         |        |                  |                 |         |
| All Biopsies        | Average     | 2.12     | 1.73    | -0.39  | 2.07     | 2.11    | 0.04   | -0.41            | (-0.71, -0.11)  | 0.010   |
|                     | Worst       | 3.59     | 2.83    | -0.76  | 3.11     | 3.68    | 0.57   | -1.10            | (-1.76, -0.45)  | 0.002   |
|                     | Dysp. Index | 20.81    | 10.90   | -9.91  | 22.90    | 24.60   | 1.70   | -12.45           | (-20.98, -3.92) | 0.006   |
| Reference Sites     | Average     | 2.08     | 1.71    | -0.38  | 2.04     | 2.05    | 0.01   | -0.37            | (-0.70, -0.03)  | 0.037   |
|                     | Worst       | 3.24     | 2.52    | -0.72  | 3.04     | 3.25    | 0.21   | -0.85            | (-1.49, -0.20)  | 0.013   |
|                     | Dysp. Index | 20.98    | 10.06   | -10.92 | 22.62    | 23.21   | 0.60   | -12.19           | (-21.63, -2.76) | 0.014   |
| Matched Sites       | Average     | 2.18     | 1.77    | -0.41  | 2.09     | 2.07    | -0.02  | -0.36            | (-0.71, -0.01)  | 0.049   |
|                     | Worst       | 3.59     | 2.76    | -0.83  | 3.11     | 3.46    | 0.36   | -0.96            | (-1.66, -0.26)  | 0.009   |
|                     | Dysp. Index | 22.94    | 12.57   | -10.37 | 23.51    | 23.13   | -0.38  | -10.22           | (-19.71, -0.73) | 0.040   |
| BL Non-Normal Pairs | Average     | 3.27     | 2.06    | -1.21  | 3.34     | 2.80    | -0.54  | -0.71            | (-1.32, -0.10)  | 0.029   |
|                     | Worst       | 4.57     | 3.10    | -1.48  | 4.11     | 4.00    | -0.11  | -1.19            | (-2.16, -0.22)  | 0.022   |
|                     | Dysp. Index | 43.18    | 19.58   | -23.60 | 46.39    | 42.21   | -4.19  | -21.43           | (-39.75, -3.12) | 0.028   |
| Current Smokers     |             |          |         |        |          |         |        |                  |                 |         |
| All Biopsies        | Average     | 3.13     | 3.05    | -0.07  | 2.93     | 2.87    | -0.06  | 0.06             | (-0.30, 0.42)   | 0.743   |
|                     | Worst       | 4.87     | 4.81    | -0.06  | 4.51     | 4.49    | -0.03  | 0.12             | (-0.36, 0.60)   | 0.621   |
|                     | Dysp. Index | 48.22    | 42.58   | -5.64  | 42.81    | 39.91   | -2.90  | -0.33            | (-11.70, 11.05) | 0.955   |
| Reference Sites     | Average     | 3.11     | 3.01    | -0.10  | 2.86     | 2.82    | -0.03  | 0.01             | (-0.38, 0.39)   | 0.979   |
|                     | Worst       | 4.55     | 4.55    | 0.00   | 4.22     | 4.24    | 0.03   | 0.19             | (-0.34, 0.73)   | 0.481   |
|                     | Dysp. Index | 46.34    | 41.83   | -4.52  | 39.46    | 39.28   | -0.18  | -1.83            | (-14.20, 10.55) | 0.773   |
| Matched Sites       | Average     | 3.12     | 3.04    | -0.08  | 2.92     | 2.83    | -0.09  | 0.07             | (-0.29, 0.44)   | 0.689   |
|                     | Worst       | 4.84     | 4.58    | -0.26  | 4.51     | 4.43    | -0.08  | -0.03            | (-0.53, 0.46)   | 0.891   |
|                     | Dysp. Index | 47.84    | 42.11   | -5.73  | 42.84    | 39.03   | -3.81  | 0.01             | (-11.32, 11.34) | 0.999   |
| BL Non-Normal Pairs | Average     | 3.74     | 3.37    | -0.38  | 3.29     | 2.99    | -0.30  | 0.03             | (-0.37, 0.44)   | 0.868   |
|                     | Worst       | 4.84     | 4.48    | -0.35  | 4.61     | 4.47    | -0.14  | -0.11            | (-0.62, 0.40)   | 0.674   |
|                     | Dysp. Index | 61.88    | 53.84   | -8.04  | 50.62    | 42.94   | -7.69  | 4.89             | (-8.70, 18.47)  | 0.483   |
