# Supplementary material
Source: PubMed Central journal article supplement (PMC3251330)
Supplement: NIHMS341682-supplement-st2.pdf [file NIHMS341682-supplement-st2.pdf]

**Table 2s: Incidence of Adverse Events**

| Adverse Event                                        | Iloprost<br>(N = 75) | Placebo<br>(N = 77) | P-Value |
|------------------------------------------------------|----------------------|---------------------|---------|
| <b>Grade <math>\geq</math> 3 Adverse Events</b>      |                      |                     |         |
| Hypoxia                                              | 0                    | 1                   | 0.322   |
| Pulmonary fibrosis                                   | 0                    | 1                   | 0.322   |
| Neuropathy - cranial                                 | 0                    | 1                   | 0.322   |
| Musculoskeletal-Other                                | 1                    | 2                   | 0.575   |
| SGOT (AST) (serum glutamic oxaloacetic transaminase) | 2                    | 1                   | 0.544   |
| Cardiovascular/General-Other                         | 1                    | 3                   | 0.324   |
| Hypophosphatemia                                     | 2                    | 2                   | 0.979   |
| Chest pain (non-cardiac and non-pleuritic)           | 3                    | 2                   | 0.628   |
| <b>Grade &lt; 3 Adverse Events</b>                   |                      |                     |         |
| Headache                                             | 40                   | 17                  | < .001  |
| Flushing                                             | 18                   | 6                   | 0.006   |
| Nausea                                               | 12                   | 6                   | 0.117   |
| Pain-Other                                           | 12                   | 6                   | 0.117   |
| Myalgia (muscle pain)                                | 13                   | 1                   | < .001  |
| Fatigue                                              | 8                    | 2                   | 0.045   |
| Metabolic/Laboratory-Other                           | 3                    | 6                   | 0.322   |
| Neuropathic pain                                     | 7                    | 1                   | 0.027   |
| Diarrhea patients without colostomy                  | 4                    | 3                   | 0.673   |
| Dermatology/Skin-Other                               | 2                    | 4                   | 0.424   |
| Gastrointestinal-Other                               | 2                    | 4                   | 0.424   |
| Neurology-Other                                      | 3                    | 3                   | 0.974   |
| Sinus bradycardia                                    | 2                    | 4                   | 0.424   |
| Taste disturbance (dysgeusia)                        | 6                    | 0                   | 0.011   |
| Arthralgia (joint pain)                              | 3                    | 2                   | 0.628   |
| Dizziness/lightheadedness                            | 3                    | 2                   | 0.628   |
| GGT (Gamma-Glutamyl transpeptidase)                  | 1                    | 4                   | 0.182   |
| Hyperglycemia                                        | 4                    | 1                   | 0.163   |
| Hyperkalemia                                         | 3                    | 2                   | 0.628   |
| Abdominal pain or cramping                           | 1                    | 3                   | 0.324   |
| Cough                                                | 2                    | 2                   | 0.979   |
