# Supplementary material
Source: PubMed Central journal article supplement (PMC3251330)

Figure 2s: Consistency of treatment effects with alternative histology endpoints

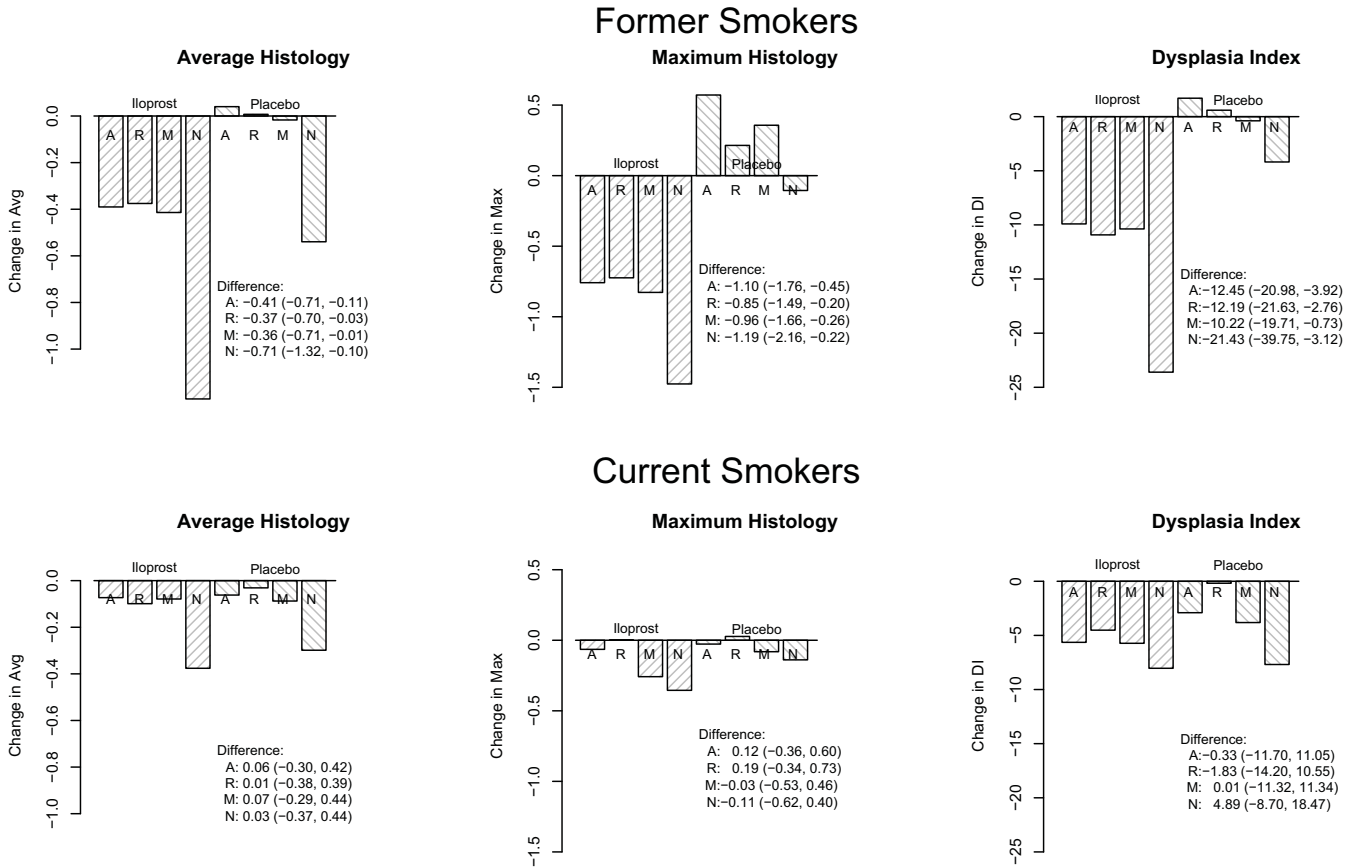

Supplement: NIHMS341682-supplement-sf2.pdf [file NIHMS341682-supplement-sf2.pdf]
